# Supplementary material for: Maladaptive brain organization at 1 month into abstinence as an indicator for future relapse in patients with alcohol use disorder
Source: PubMed Central journal article supplement — Eur J Neurosci. 2021 Mar 17;53(8):2923–38. doi: 10.1111/ejn.15161 (PMC8252378; doi:10.1111/ejn.15161), 2021-03-17
Supplement: EJN-53-2923-s001.pdf [file EJN-53-2923-s001.pdf]

## Supplement

**Table S1**

|                                         | AUD at TP1     |               | ABS at TP1     |                | REL at TP1     |               |
|-----------------------------------------|----------------|---------------|----------------|----------------|----------------|---------------|
|                                         | With follow-up | Dropouts      | With follow-up | Dropouts       | With follow up | Dropouts      |
| <b>N</b>                                | 24             | 10            | 10             | 2              | 14             | 8             |
| <b>Age [years]</b>                      | 40.8 (8.9)     | 43.9 (12.1)   | 37.9 (8.4)     | 36.3 (5.5)     | 42.9 (9.1)     | 45.9 (12.7)   |
| <b>Gender F M [n]</b>                   | 11 13          | 5 5           | 6 4            | 2 0            | 5 9            | 3 5           |
| <b>Education [years]</b>                | 15.3 (1.8) *   | 13.6 (1.9) *  | 15.1 (1.9)     | 13.0 (1.4)     | 15.5 (1.8) *   | 13.8 (2.1) *  |
| <b>AUDIT</b>                            | 31.09 (4.45)   | 31.76 (5.66)  | 32.75 (5.65)   | 34.33(4.05)    | 31.15 (5.80)   | 29.85 (4.05)  |
| <b>1-year average [drinks/month]</b>    | 361.8 (255.6)  | 353.6 (154.1) | 329.6 (192.9)  | 554.2 (220.3)  | 384.8 (297.5)  | 303.4 (96.1)  |
| <b>Lifetime average [drinks/months]</b> | 182.3 (99.79)  | 202.1 (87.4)  | 160.9 (80.7) * | 298.9 (77.5) * | 197.6 (111.8)  | 177.9 (75.1)  |
| <b>Smokers No/Current/Former [n]</b>    | 13 6 5         | 4 5 1         | 6 1 3          | 1 1 0          | 7 5 2          | 3 4 1         |
| <b>FTND Total score</b>                 | 1.8 (2.0)      | 3.3 (2.1)     | 0.7 (1.5) *    | 5 *            | 2.4 (2.1)      | 3.0 (2.1)     |
| <b>BIS-II-Total score</b>               | 66.4 (10.6)    | 66.3 (11.4)   | 67.2 (9.2)     | 59.0 (1.4)     | 65.8 (11.9)    | 68.1 (12.1)   |
| <b>BDI_Total score</b>                  | 14.4 (6.8) *   | 12.9 (8.6)*   | 13.4 (9.1)     | 5.0 (2.8)      | 15.1 (8.4)     | 14.9 (6.0)    |
| <b>STAI_State score</b>                 | 37.4 (10.6)    | 39.4 (15.2)   | 38.8 (11.43)   | 31.0 (7.1)     | 36.4 (10.2)    | 41.5 (16.3)   |
| <b>STAI_Trait score</b>                 | 46.9 (11.7) *  | 48.2 (11.1)*  | 47.6 (12.7)    | 44.0 (4.2)     | 46.4 (11.4)*   | 49.2 (12.2) * |

**Table S1: Comparison of AUD participants with and without follow-up.** Mean value with SD in brackets; an asterisk indicates that participants with and without follow-up showed statistical relevant differences at a level of  $p < 0.05$ . Abbreviations: AUD = subjects with alcohol use disorder; ABS = abstainers, REL = relapsers; TP = timepoint; FTND = Fagerstrom Test for Nicotine Dependence; BIS-II = Barratt Impulsiveness Scale, BDI = Beck Depression Inventory; STAI State/STAI Trait = State-Trait Anxiety Inventory State/Trait).

**Table S2**

|                                                   | TP1           |               |         | TP2           |               |         |
|---------------------------------------------------|---------------|---------------|---------|---------------|---------------|---------|
|                                                   | Mean          | SD            | p Value | Mean          | SD            | p Value |
| <b>Maximum Voxel Displacement in mm</b>           |               |               |         |               |               |         |
| LDC vs ABS                                        | 0.304 / 0.254 | 0.190 / 0.098 | 0.38    | 0.327 / 0.272 | 0.181 / 0.183 | 0.41    |
| LDC vs REL                                        | 0.304 / 0.346 | 0.190 / 0.158 | 0.37    | 0.327 / 0.296 | 0.181 / 0.143 | 0.61    |
| ABS vs REL                                        | 0.254 / 0.346 | 0.098 / 0.158 | 0.13    | 0.272 / 0.296 | 0.183 / 0.143 | 0.73    |
| <b>Number of Motion Corrupted Outlier Volumes</b> |               |               |         |               |               |         |
| LDC vs ABS                                        | 17.6/7.4      | 19.7/8.4      | 0.11    | 16.6/9.7      | 21.0/21.0     | 0.34    |
| LDC vs REL                                        | 17.6/17.3     | 19.7/ 20.9    | 0.95    | 16.6/9.5      | 21.0/12.0     | 0.27    |
| ABS vs REL                                        | 7.4/17.3      | 8.4/20.9      | 0.14    | 9.7/9.5       | 21.0/12.0     | 0.98    |

**Table S2: Results of the Student t-tests for group-specific differences in motion artifacts and other physiological confounds.** Abbreviations: LDC = (light drinking) controls; ABS = abstainers, REL = relapsers, TP = timepoint, SD = standard deviation.

**Figures S1a - f: Similarity of the community allocation between groups at timepoint 1 and timepoint 2.** The individual figures a – f represent similarity matrices, the color yellow codes community allocation that are not shared between the two compared groups, the color blue codes shared community allocations. The anatomical order of the 384 rows/384 columns in the similarity matrices is as follows: 1 – 18: left and right superior frontal regions; 19 – 28 left and right middle frontal regions; 29 – 34 left and right inferior frontal regions; 35 – 50 left and right orbital frontal regions; 51 – 70 left and right precentral regions; 71 – 76 left and right postcentral regions; 77 – 86 left and right superior parietal regions; 87 – 100 left and right supramarginal regions; 101 – 106 left and right angular gyrus regions; 107 – 114 left and right inferior parietal regions; 115 – 144 left and right occipital regions; 145 – 156 left and right insula regions; 157 – 160 left and right rolandic operculum regions; 161 – 178 left and right superior temporal regions; 179 – 186 middle temporal regions; 187 – 196 left and right inferior temporal regions; 197 – 206 left and right temporal pole; 207 – 220 left and right medial frontal regions; 221 – 226 left and right supplemental motor area regions; 229 – 256 left and right anterior – middle-posterior cingulate cortex regions; 257 – 264 left and right paracentral lobule regions; 265 – 282 left and right precuneus; 283 – 294 left and right parieto-occipital regions; 295 – 298 left and right cuneus regions; 299 – 304 left and right calcarine regions; 305 – 316 left and right lingual gyrus regions; 317 – 330 left and right hippocampus and parahippocampal gyri regions; 331 – 344 left and right fusiformis gyrus regions; 345 – 346 left and right amygdala; 347 – 366 left and right basal ganglia regions; 367 – 384 left and right thalamus regions.

**Figure S1a**

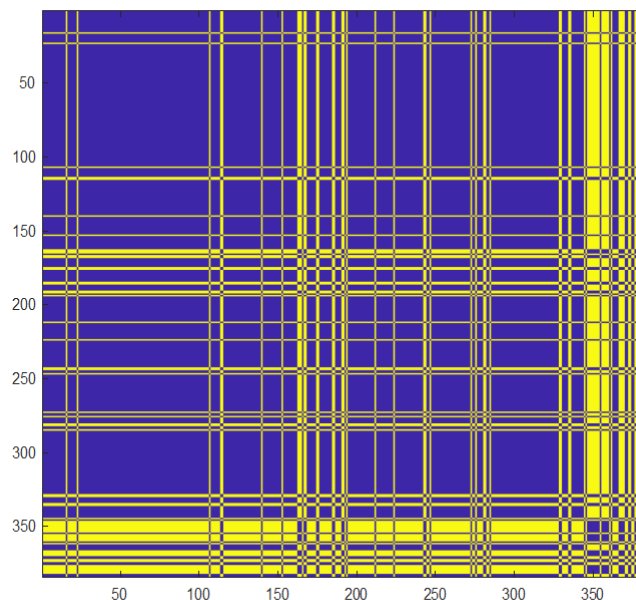

**Figure S1a: Similarity matrix for controls vs relapsers at timepoint 1.** Relapsers and controls share the same community allocation for 84.37% of the nodes at timepoint 1.

**Figure S1b**

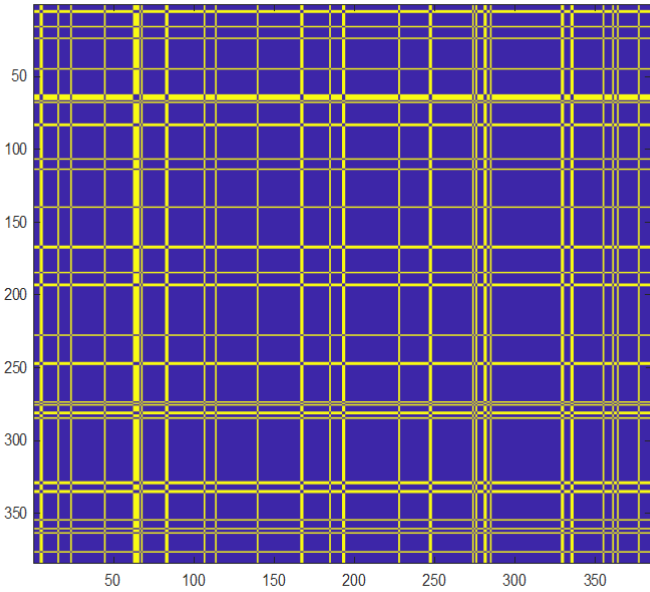

**Figure S1b: Similarity matrix for controls vs abstainers at timepoint 1.** Abstainers and controls share the same community allocation for 90.62% of the nodes at timepoint 1

**Figure S1c**

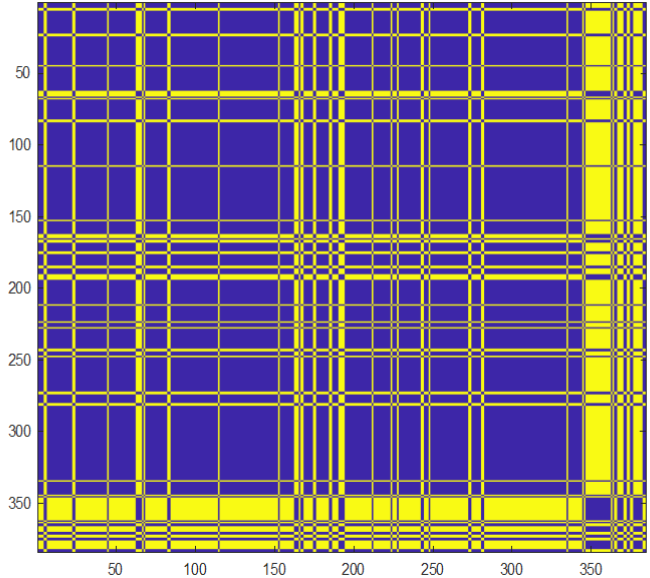

**Figure S1c: Similarity matrix for abstainers vs relapsers at timepoint 1.** Relapsers and abstainers share the same community allocation for 82.29% of the nodes at timepoint 1

**Figure S1d**

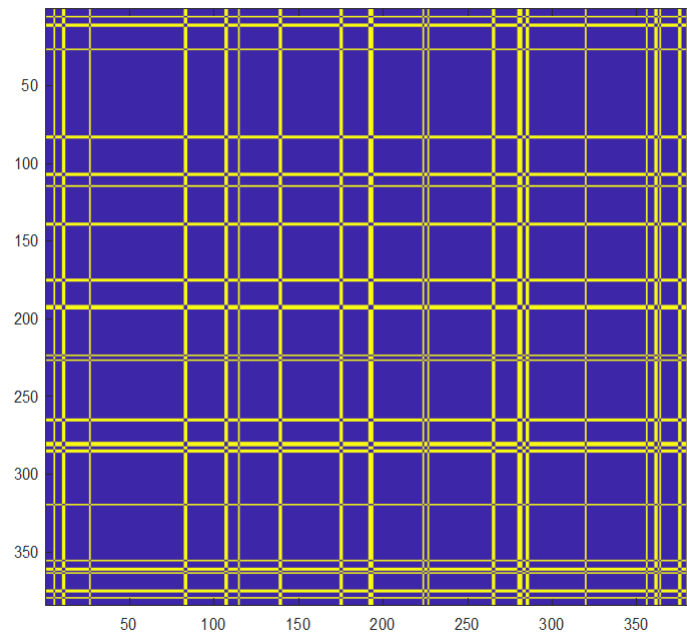

**Figure S1d: Similarity matrix for controls vs relapsers at timepoint 2.** Relapsers and controls share the same community allocation for 91.41% of the nodes at timepoint 2.

**Figure S1e**

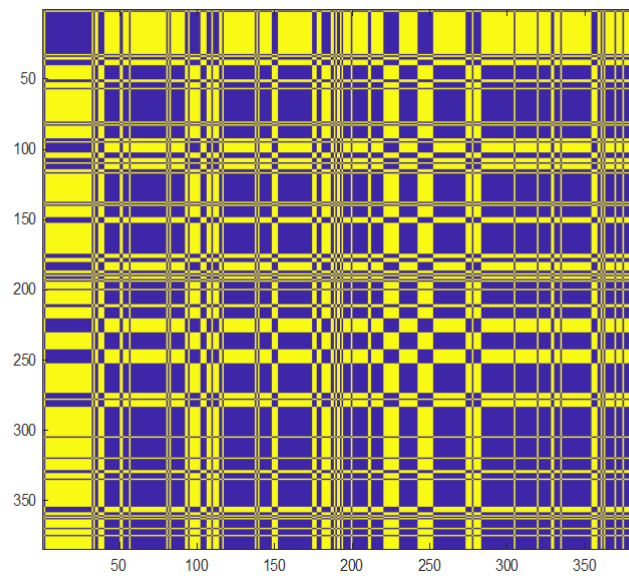

**Figure S1e: Similarity matrix for controls vs abstainers at timepoint 2.** Abstainers and controls share the same community allocation for 68.83% of the nodes at timepoint 2.

**Figure S1f**

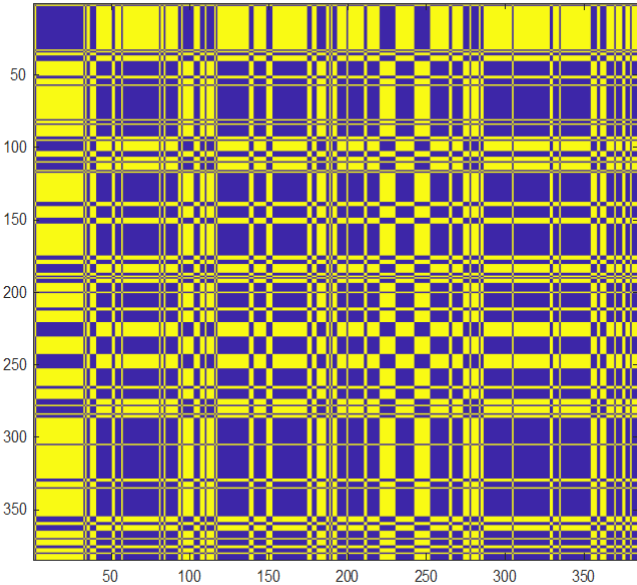

**Figure S1f: Similarity matrix for abstainers vs relapsers at timepoint 2.** Relapsers and abstainers share the same community allocation for 65.98% of the nodes at timepoint 2
